# Supplementary material for: Early life stages of fish under ocean alkalinity enhancement in coastal plankton communities
Source: Copernicus journal article supplement (doi:10.5194/bg-21-4521-2024), 2024-10-17
Supplement: Supplementary file 1 [file bg-21-4521-2024-supplement.pdf]

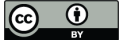

*Supplement of*

## **Early life stages of fish under ocean alkalinity enhancement in coastal plankton communities**

**Silvan Urs Goldenberg et al.**

*Correspondence to:* Silvan Urs Goldenberg ([sgoldenberg@geomar.de](mailto:sgoldenberg@geomar.de))

The copyright of individual parts of the supplement might differ from the article licence.

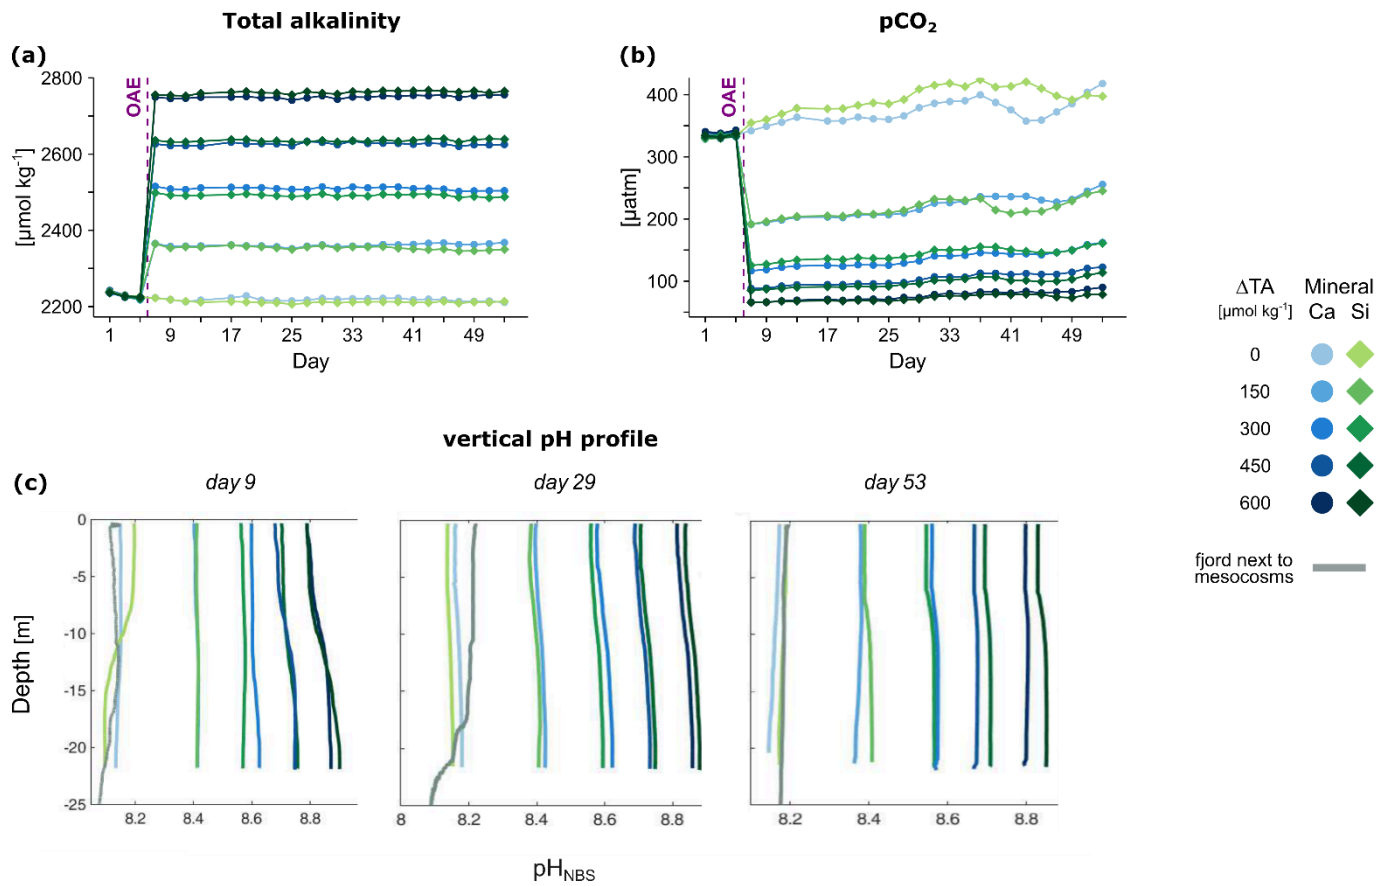

**Figure S1: Further assessment of carbonate chemistry.** Development of **a)** total alkalinity (TA) and **b)** pCO<sub>2</sub> in each mesocosm unit. **c)** Depth-dependent variability in pH. Sampling days at the beginning, middle and end of the treatment period serve as examples. These pH measures were taken in situ via CTD with a potentiometric pH sensor (NBS scale) and are hence slightly higher than the spectrometric measures (total scale) shown in figure 1c.

**Table S1: Linear models for the responses of fish to OAE, to accompany figure 2 and 3.  $\Delta TA$  is employed as continuous and *Mineral* as categorical explanatory variable.**

| Response variable                                                           | Source of variation               | MS    | df | F-ratio | p-value |
|-----------------------------------------------------------------------------|-----------------------------------|-------|----|---------|---------|
| a) Mortality longer-term (all taxa days 7-53)                               | $\Delta TA$                       | 12    | 1  | 0.06    | 0.818   |
|                                                                             | Mineral                           | 192   | 1  | 0.93    | 0.373   |
|                                                                             | $\Delta TA \times \text{Mineral}$ | 0     | 1  | 0.00    | 0.976   |
|                                                                             | Residuals                         | 207   | 6  |         |         |
| b) Mortality shorter-term (herring only, days 7-15)                         | $\Delta TA$                       | 5.0   | 1  | 0.09    | 0.776   |
|                                                                             | Mineral                           | 9.6   | 1  | 0.17    | 0.693   |
|                                                                             | $\Delta TA \times \text{Mineral}$ | 20.0  | 1  | 0.36    | 0.573   |
|                                                                             | Residuals                         | 56.2  | 6  |         |         |
| c) Abundance (all taxa day 54)                                              | $\Delta TA$                       | 2     | 1  | 0.00    | 0.949   |
|                                                                             | Mineral                           | 333   | 1  | 0.82    | 0.401   |
|                                                                             | $\Delta TA \times \text{Mineral}$ | 180   | 1  | 0.44    | 0.532   |
|                                                                             | Residuals                         | 409   | 6  |         |         |
| d) Per capita size (all taxa day 54)<br><i>log<sub>10</sub> transformed</i> | $\Delta TA$                       | 0.270 | 1  | 5.00    | 0.067   |
|                                                                             | Mineral                           | 0.038 | 1  | 0.69    | 0.437   |
|                                                                             | $\Delta TA \times \text{Mineral}$ | 0.063 | 1  | 1.17    | 0.321   |
|                                                                             | Residuals                         | 0.054 | 6  |         |         |
| e) Biomass (all taxa day 54)                                                | $\Delta TA$                       | 11.9  | 1  | 10.92   | 0.016   |
|                                                                             | Mineral                           | 0.0   | 1  | 0.00    | 0.994   |
|                                                                             | $\Delta TA \times \text{Mineral}$ | 0.8   | 1  | 0.78    | 0.412   |
|                                                                             | Residuals                         | 0.8   | 6  |         |         |

MS = mean squares; df = degrees of freedom

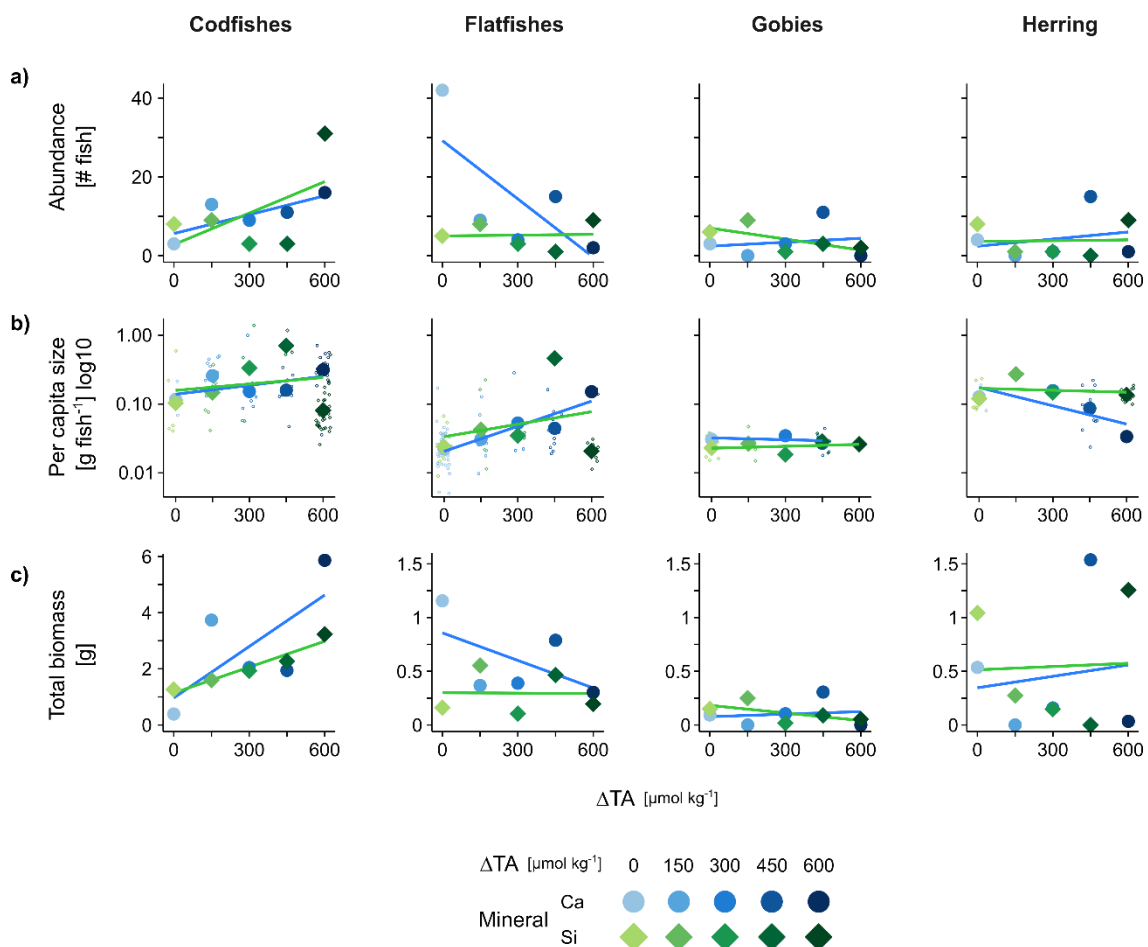

**Figure S2: Responses of individual fish taxa to OAE, assessed at the end of the experiment. Count (a), individual size (b) and total biomass (c) of live fish. Larger points represent mesocosms and smaller points in b single individuals.**

**Table S2: Linear models for the response of other functional groups (a-c) and predation on herring (d) under OAE, to accompany figure 4.  $\Delta TA$  is employed as continuous and *Mineral* as categorical explanatory variable.**

| Response variable                   | Source of variation        | MS     | df | F-ratio | p-value |
|-------------------------------------|----------------------------|--------|----|---------|---------|
| <b>a) Chlorophyll a (days 7-53)</b> | $\Delta TA$                | 0.0034 | 1  | 0.28    | 0.613   |
|                                     | Mineral                    | 0.0122 | 1  | 1.01    | 0.353   |
|                                     | $\Delta TA \times Mineral$ | 0.0088 | 1  | 0.73    | 0.426   |
|                                     | Residuals                  | 0.0121 | 6  |         |         |
| <b>b) Copepods (days 7-53)</b>      | $\Delta TA$                | 0.5    | 1  | 0.05    | 0.838   |
|                                     | Mineral                    | 11.2   | 1  | 1.03    | 0.349   |
|                                     | $\Delta TA \times Mineral$ | 1.6    | 1  | 0.14    | 0.719   |
|                                     | Residuals                  | 10.9   | 6  |         |         |
| <b>c) Hydrozoa (days 7-53)</b>      | $\Delta TA$                | 16.0   | 1  | 0.39    | 0.554   |
|                                     | Mineral                    | 15.2   | 1  | 0.37    | 0.563   |
|                                     | $\Delta TA \times Mineral$ | 26.9   | 1  | 0.66    | 0.446   |
|                                     | Residuals                  | 40.5   | 6  |         |         |
| <b>d) Fish missing (days 7-54)</b>  | $\Delta TA$                | 51     | 1  | 0.37    | 0.563   |
|                                     | Mineral                    | 97     | 1  | 0.71    | 0.431   |
|                                     | $\Delta TA \times Mineral$ | 88     | 1  | 0.65    | 0.452   |
|                                     | Residuals                  | 137    | 6  |         |         |

MS = mean squares; df = degrees of freedom
